# Supplementary material for: Myocardial Aldosterone Receptor and Aquaporin 1 Up-Regulation Is Associated with Cardiomyocyte Remodeling in Human Heart Failure
Source: MDPI journal article supplement (doi:10.3390/jcm10214854), 2021-10-22
Supplement: s1 [file s1]

## **Supplemental material**

**Supplemental Table S1. Transmission electron microscopy features before and after therapy in 8 patients with heart failure baseline and at 6-month follow up.**

| <b>Features</b>            | <b>Baseline</b>                                   | <b>At 6-month follow up</b>  |
|----------------------------|---------------------------------------------------|------------------------------|
| Myocardiocyte axis         | Increased                                         | Decreased/normal             |
| General swelling           | evident                                           | Recovered                    |
| Presence of large vesicles | Frequent                                          | Absent                       |
| Sarcoplasmic reticulum     | Dilated                                           | Normal/partially recovered   |
| Golgi cisternae            | Irregularly dilated                               | Dilated (increased function) |
| Mitochondria               | Swollen/vesculated                                | Orthodox/condensed/energized |
| Mitochondria dynamics      | Abnormal fission/fusion                           | Apparently normal            |
| Mitochondria distribution  | Grouping                                          | Mostly columnar              |
| Intercalated disc          | Occasionally disrupted                            | Apparently recovered         |
| Lateral junctions          | Disrupted                                         | Recovered                    |
| Sarcomeres                 | Myofibrillolysis                                  | Recovered                    |
| Extracellular space        | Dilated/highly enlarged<br>(extracellular oedema) | Normal/partially recovered   |

**Supplemental Figures showing baseline transmission electron microscopy findings**

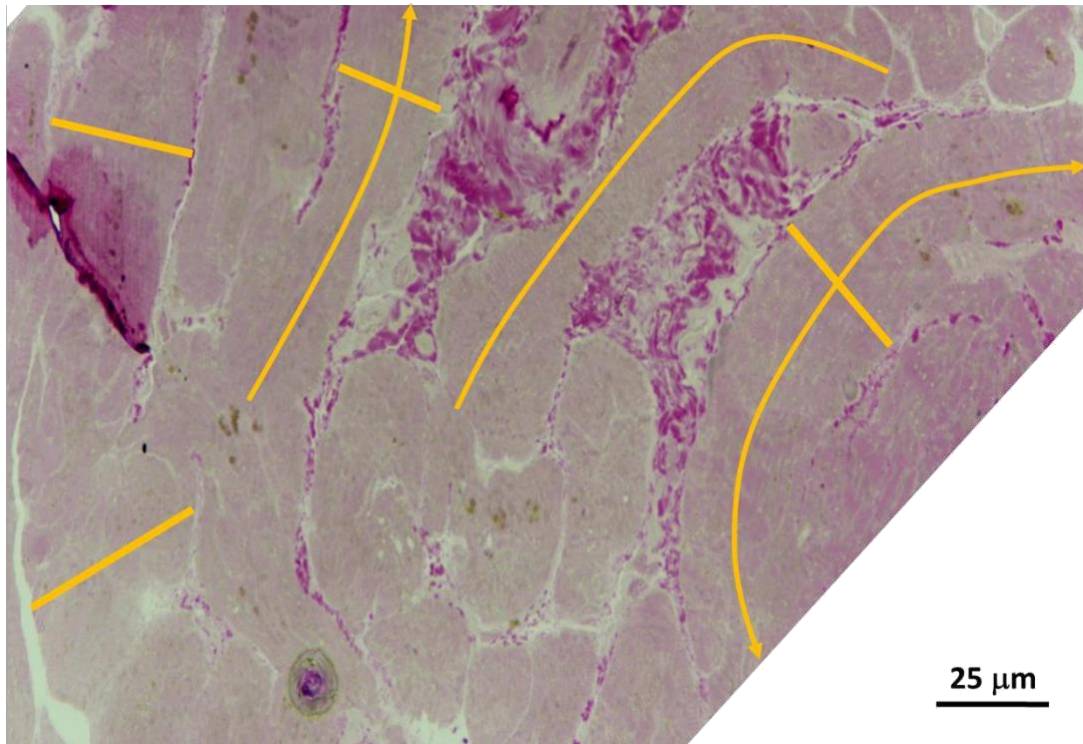

**Supplemental Figure S1. Baseline left ventricular endomyocardial biopsy showing increased myocardiocyte axis and focal fibrosis**

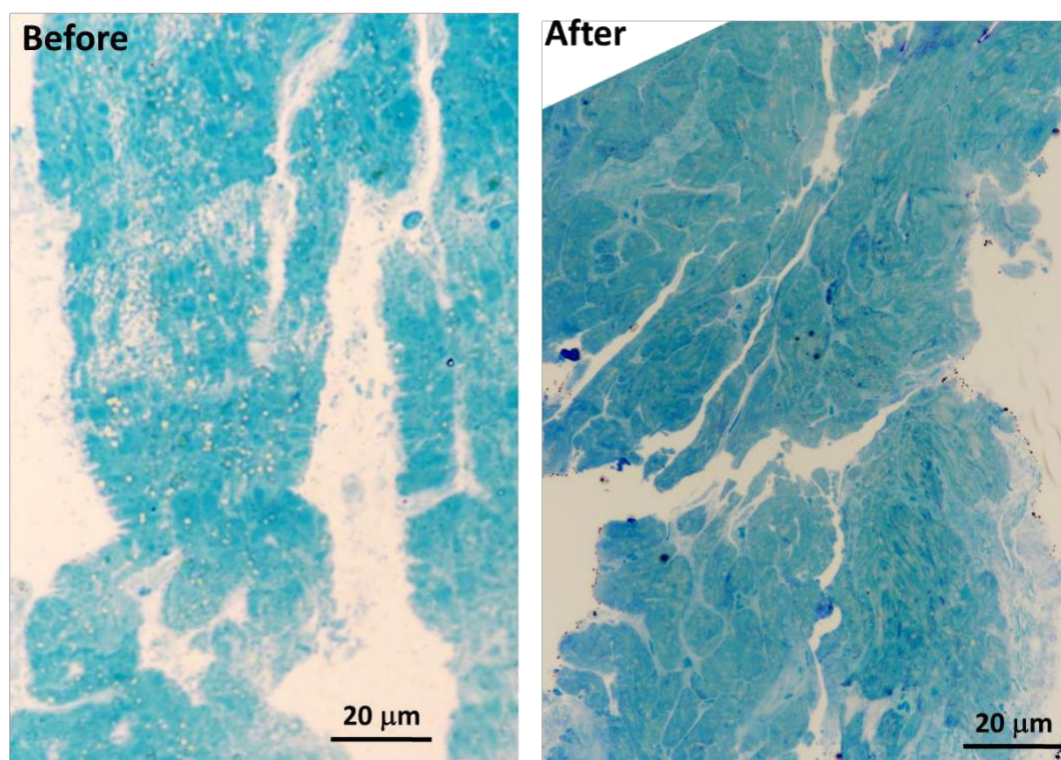

**Supplemental Figure S2. Transmission electron microscopy showing vesiculation before and its recovery after therapy**



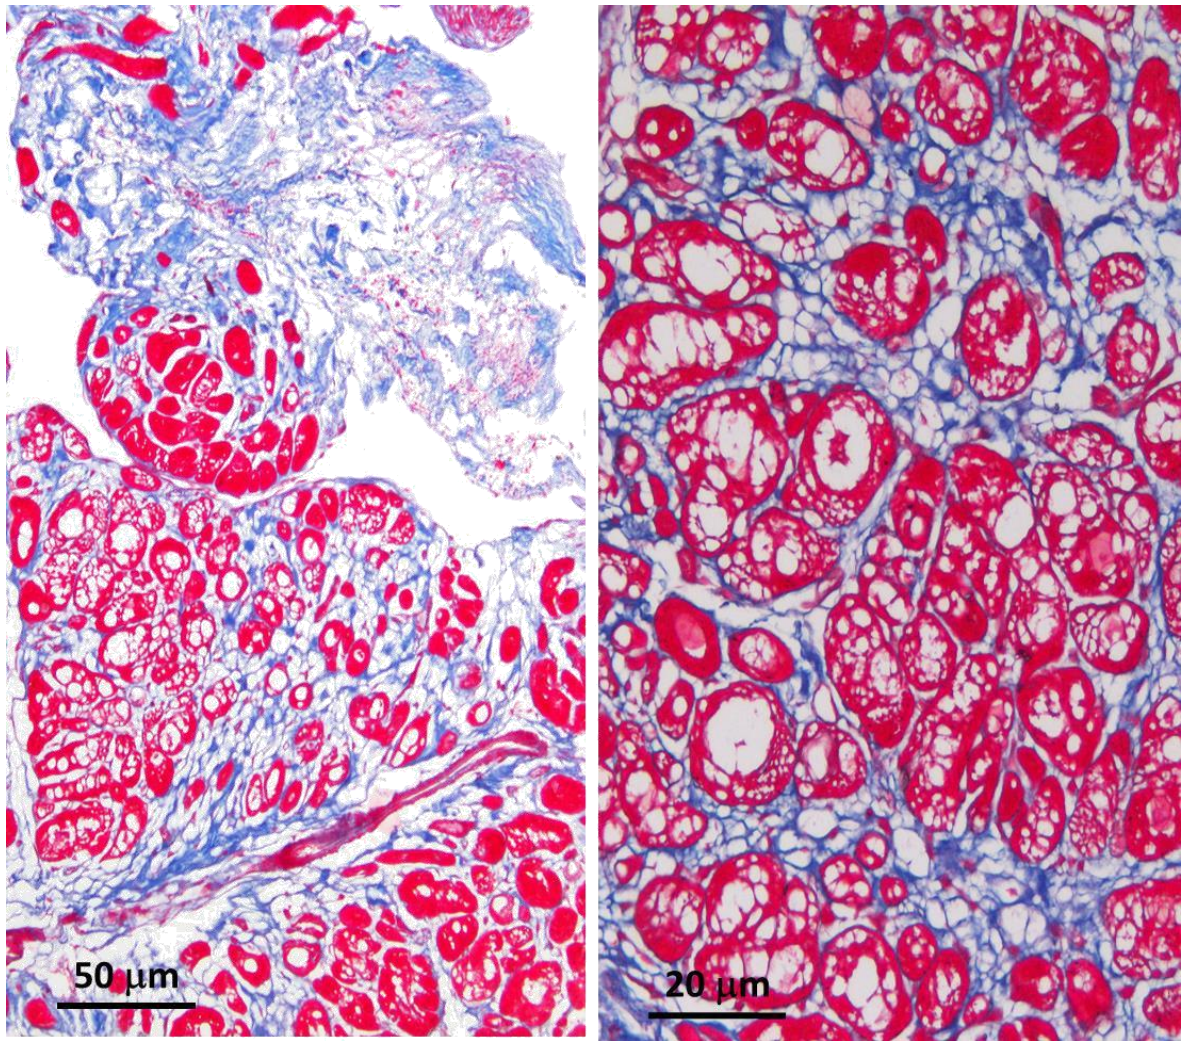

**Supplemental Figure S3. Baseline left ventricular endomyocardial biopsy showing hypertrophy, large/small vesicles, increased extracellular space, fibrosis.**

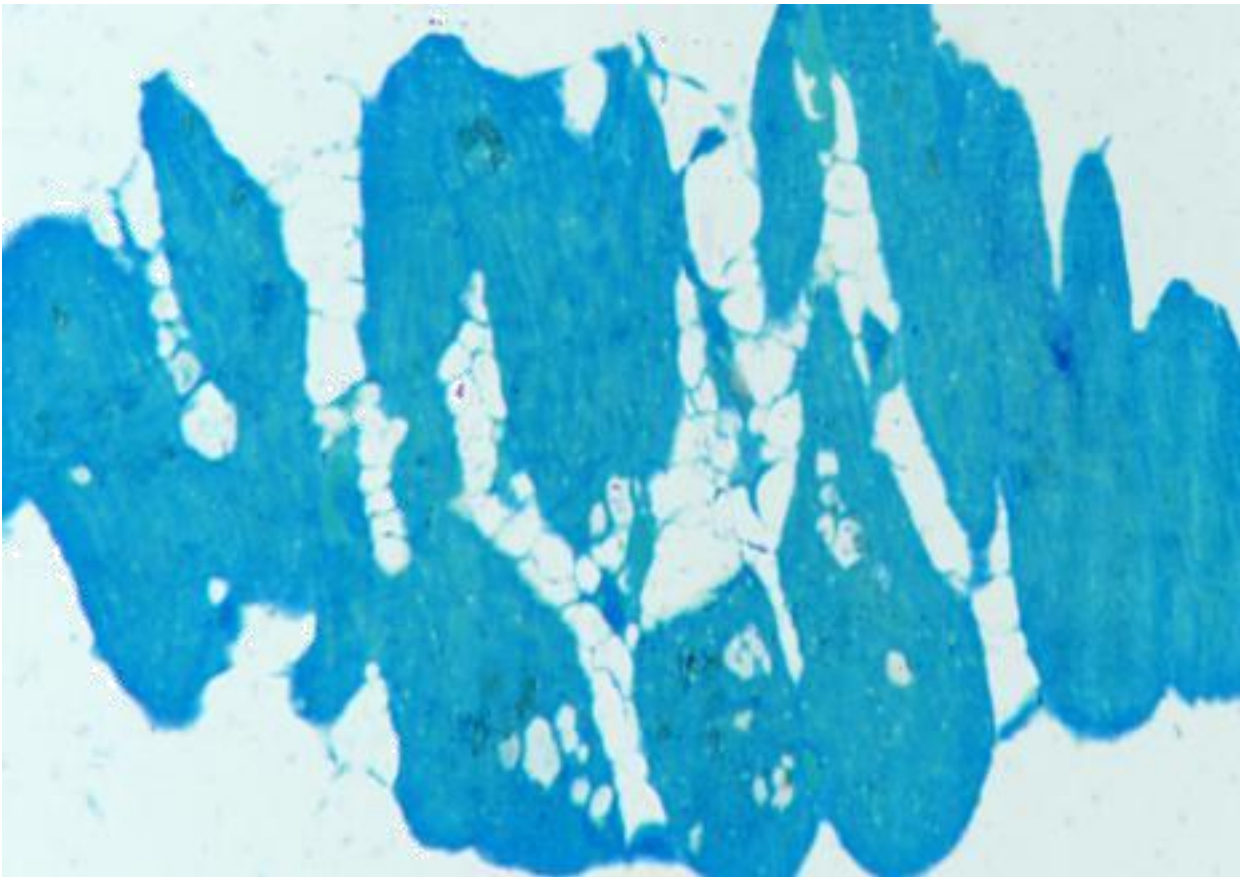

**Supplemental Figure S4. Baseline transmission electron microscopy showing hypertrophy, large vesicles, increased extracellular space (plastic section, Azur II stained).**

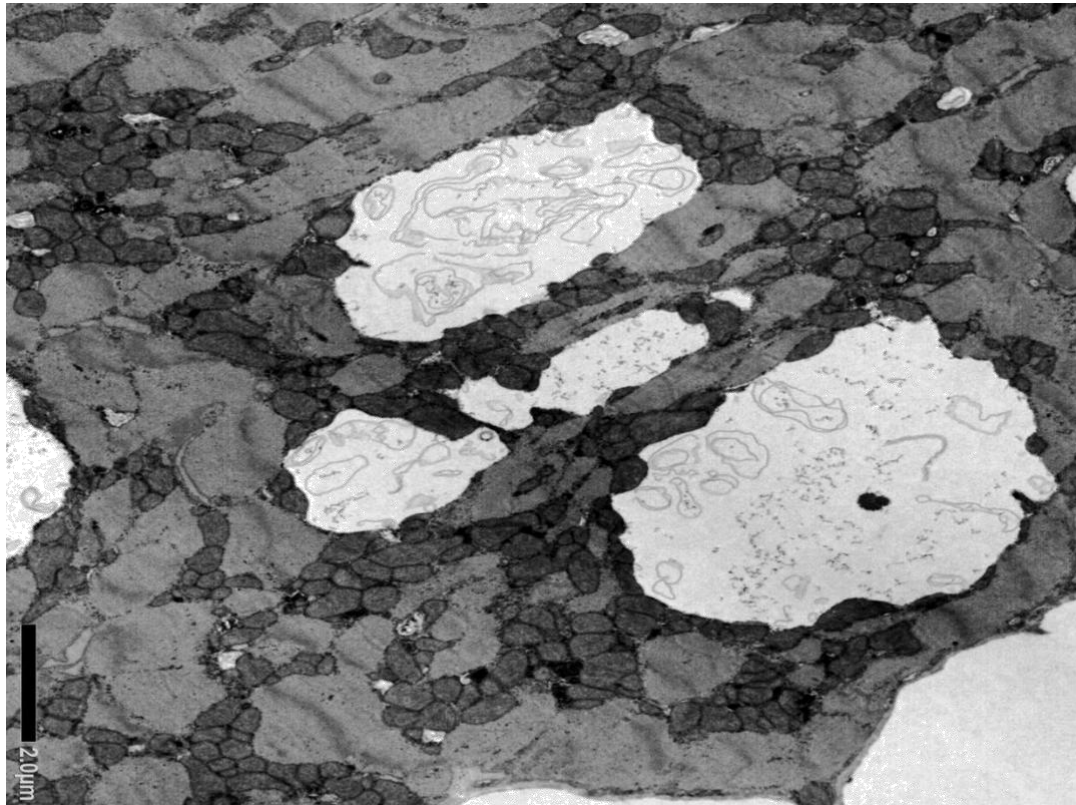

**Supplemental Figure S5. Baseline transmission electron microscopy showing vacuolar degeneration: large intracellular vesicles with clear content.**



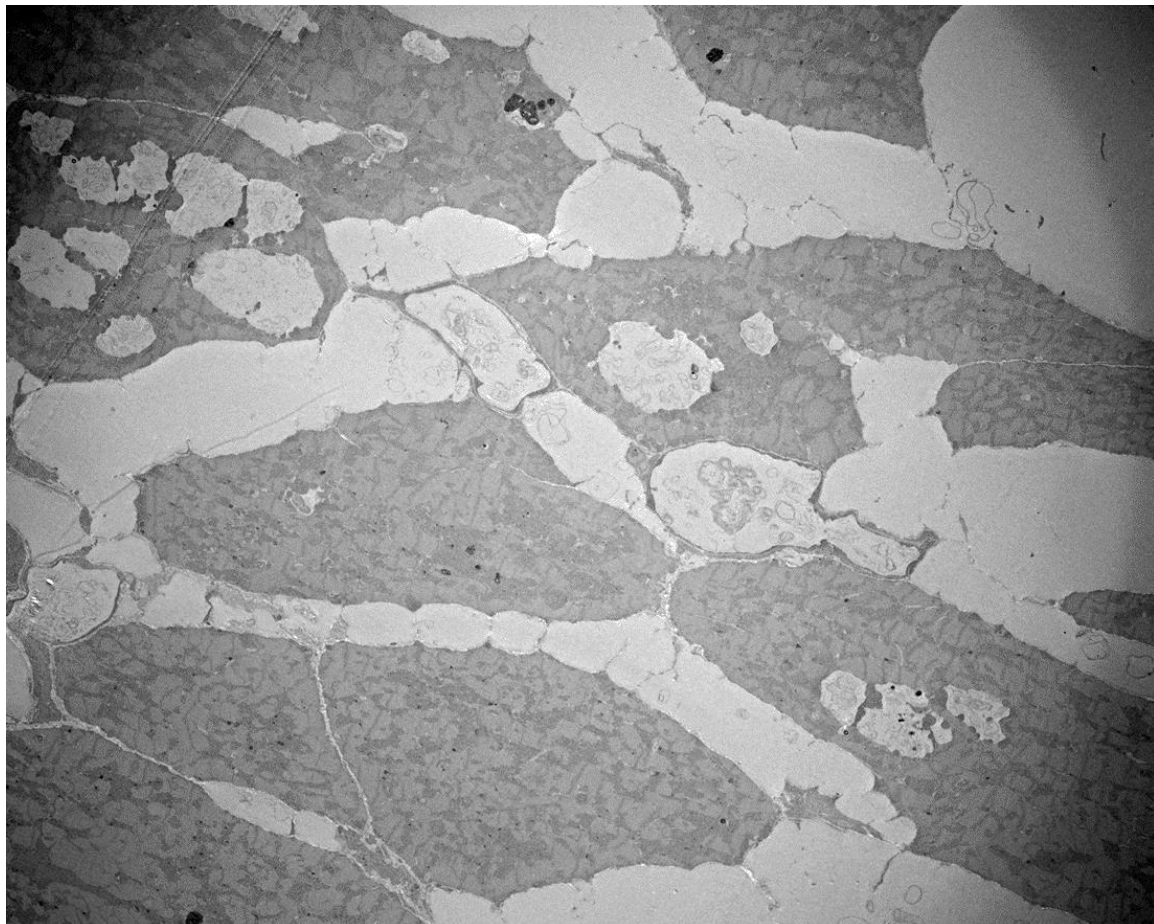

TEM\_SR\_0089\_004.tif  
Cal: 0.019945  $\mu\text{m}/\text{pix}$   
11:02 2/12/2021

Camera: BIOSPR12, Exposure: 500 (ms) x 10 std. frames, Gain: 1, Bin: 1  
Gamma: 1.00, No Sharpening, Normal Contrast

8  $\mu\text{m}$   
HV=100kV  
Direct Mag: 500 x  
SR MEBIC

**Supplemental Figure S6. Baseline transmission electron microscopy showing vacuolar degeneration: large intracellular vesicles with clear content enlarged extracellular space with clear content (extracellular edema).**

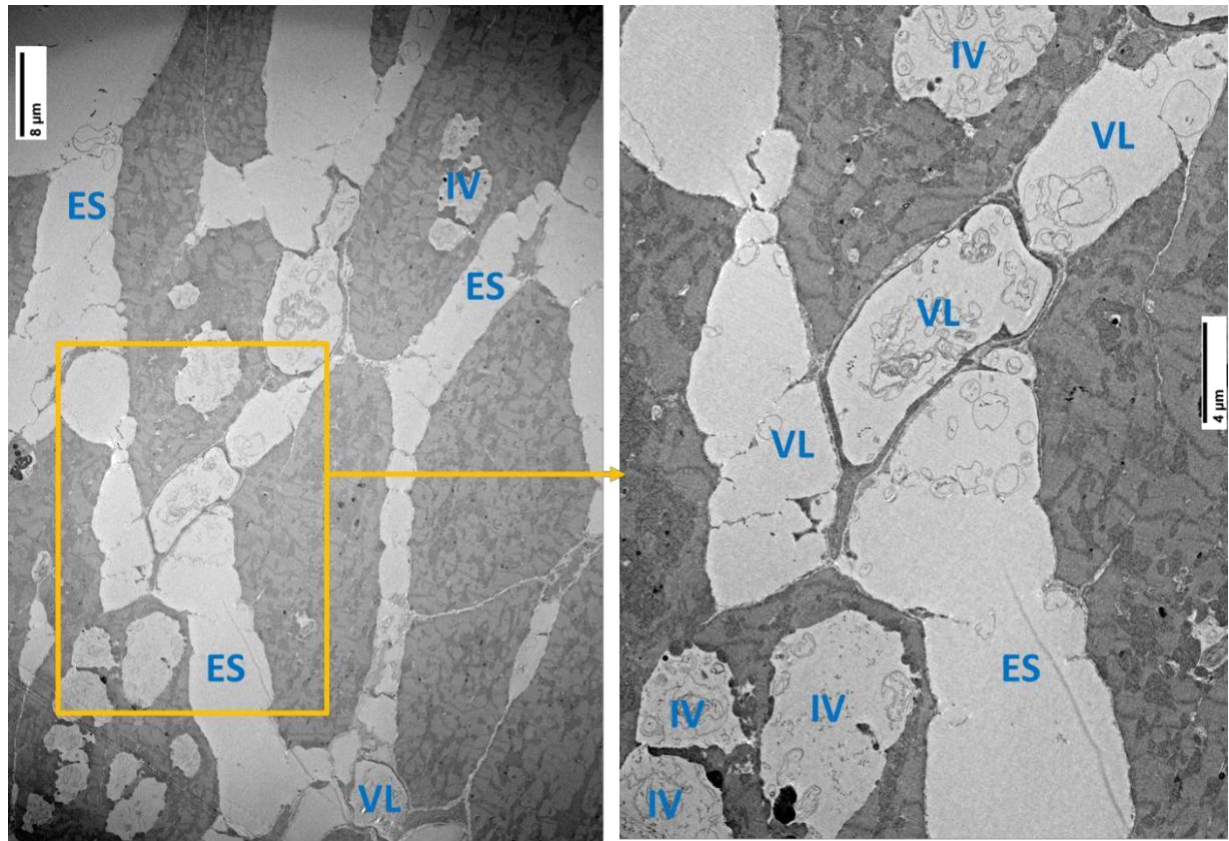

**Supplemental Figure S7. Baseline transmission electron microscopy showing vacuolar degeneration: large intracellular vesicles (IV) with clear content and extracellular edema (large amount of extracellular fluids in extracellular spaces [ES] and vessel lumen [VL]).**

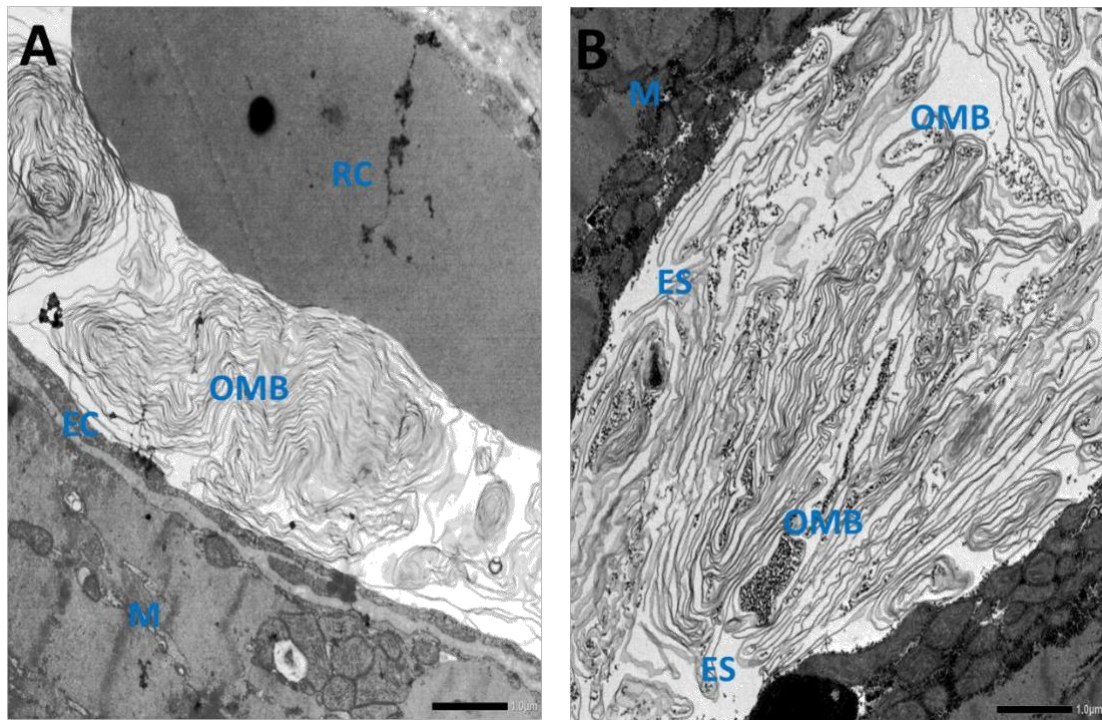

**Supplemental Figure S8. Baseline transmission electron microscopy showing enlarged vessel lumen (VL) with osmiophilic myelin-like bodies (OMB), likely degenerating lipid membranes (A). Extracellular space also containing OMB (B).**

**EC = endothelial cells; RC = Red Cell; ES = Extracellular Space**



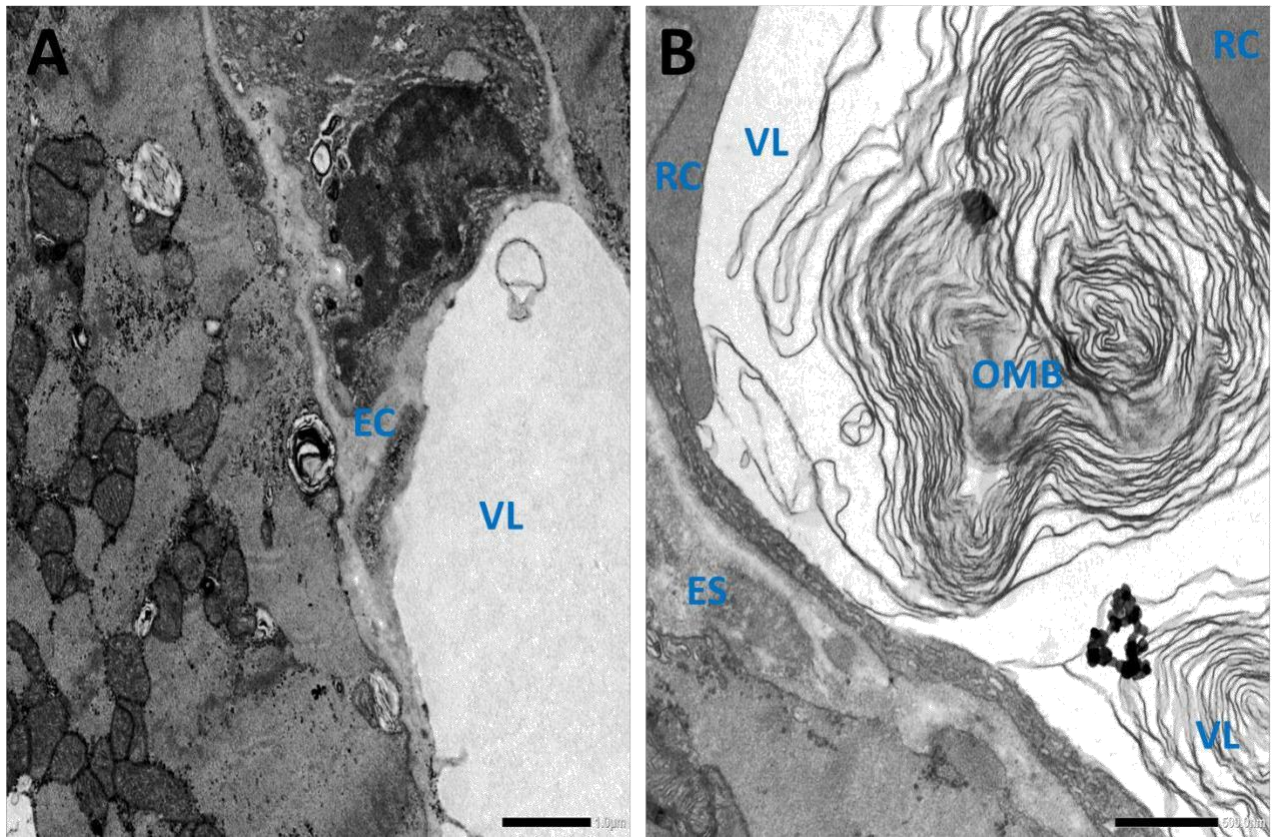

**Supplemental Figure S9. Baseline transmission electron microscopy showing enlarged vessel lumen (VL) (A) with electron clear material and/or osmiophilic myelin-like bodies (OMB), likely degenerating lipid membranes (B).**

**EC = endothelial cells; RC = Red Cell; ES = Extracellular Space**

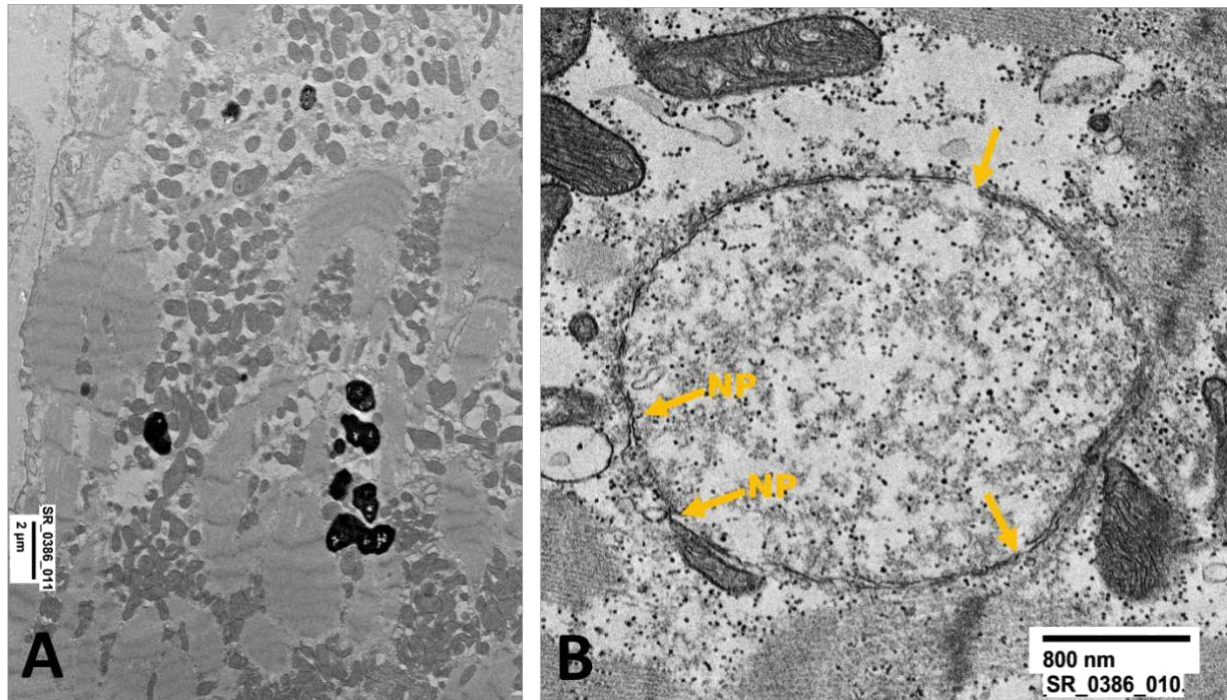

**Supplemental Figure S10. Baseline transmission electron microscopy showing myofibrillolysis and chromatolysis with nuclear membrane damage.**

A: Large areas of myofibrillolysis and sarcomere disorganization. Dense lipofiscin.

B: Nuclear damages: chromatolysis, nucleolar disorganization, nuclear membrane damages. NP = nuclear pore; Arrows = membrane fragmentation.



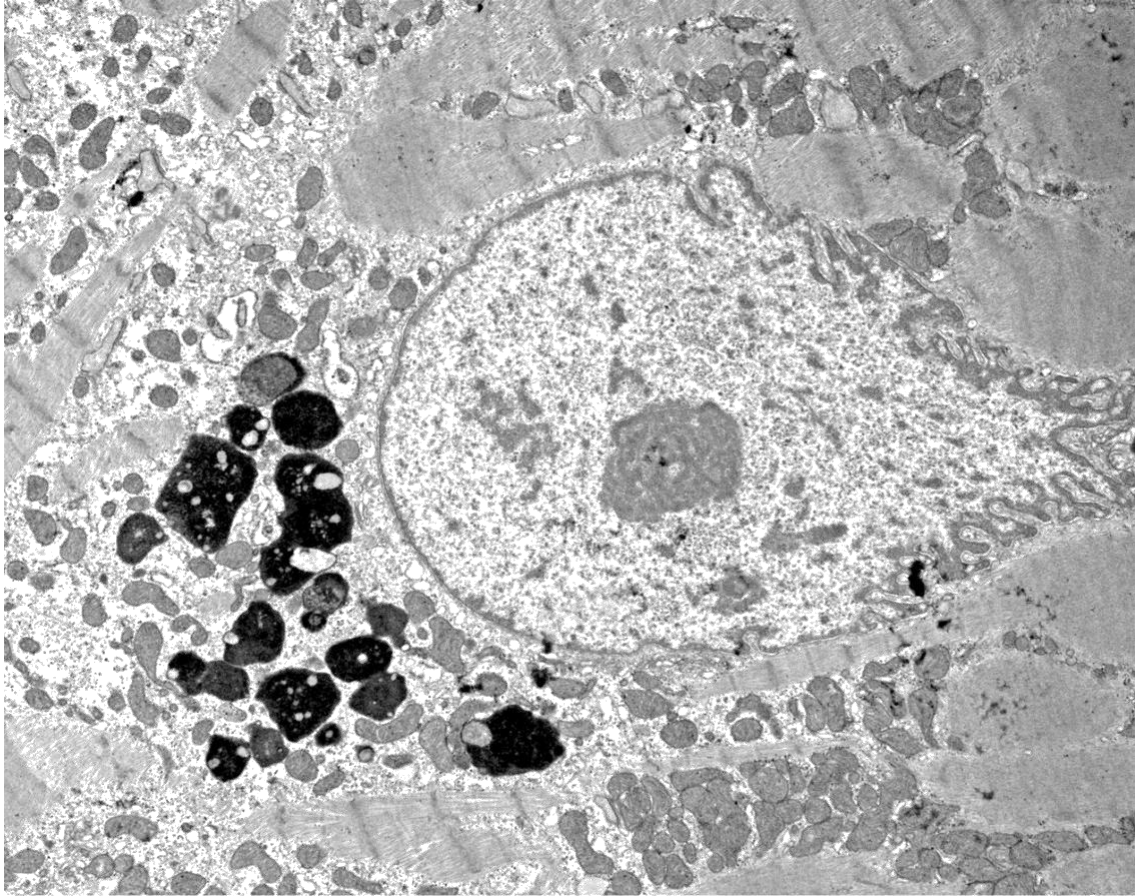

**Supplemental Figure S11. Baseline transmission electron microscopy showing nuclear changes (chromatin fragmentation, abnormal nucleolonema) and cytoplasm changes (areas of myofibrilolysis, abnormal sarcomeres and accumulation of lipofuscins).**

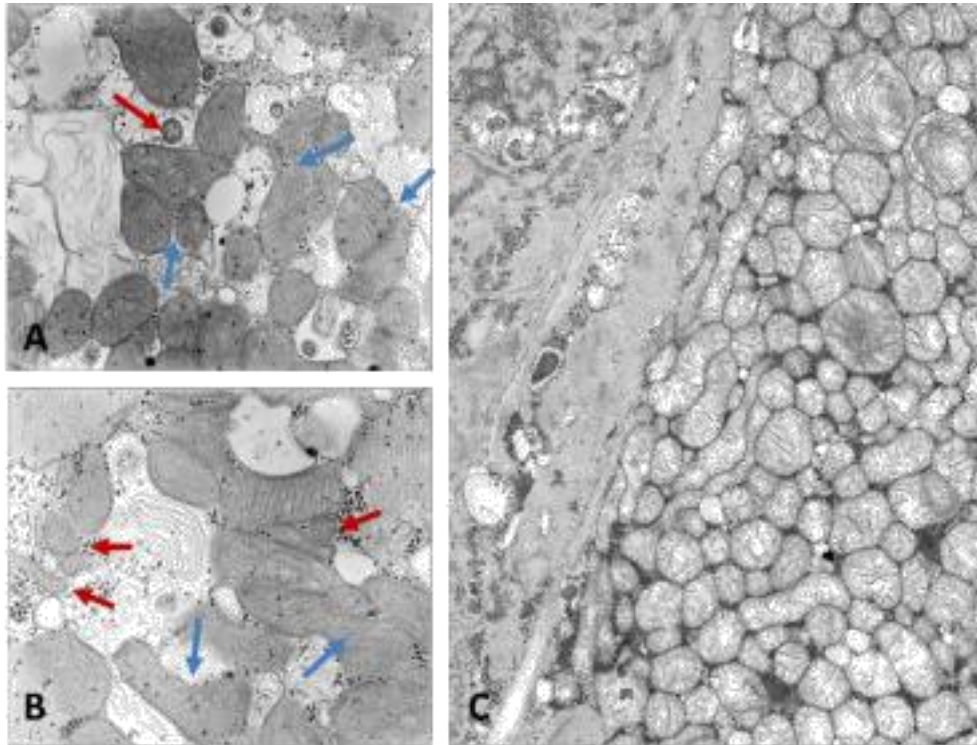

**Supplemental Figure S12. Baseline transmission electron microscopy showing alterations of mitochondrial dynamics/conformation and small vesicles dilatation (sarcoplasmic reticulum, Golgi vesicles, lysosomes, mitochondria).**

A-B. Evidences of altered fission/fusion dynamics, as shown by micro-mitochondria (red arrows) and fusing polymorphic/bizarre mitochondria (blue arrows).

C. A group of densely packed swollen mitochondria. The matrix is electron clear, while cristae are plate-like conformation, although sometimes fragmented.

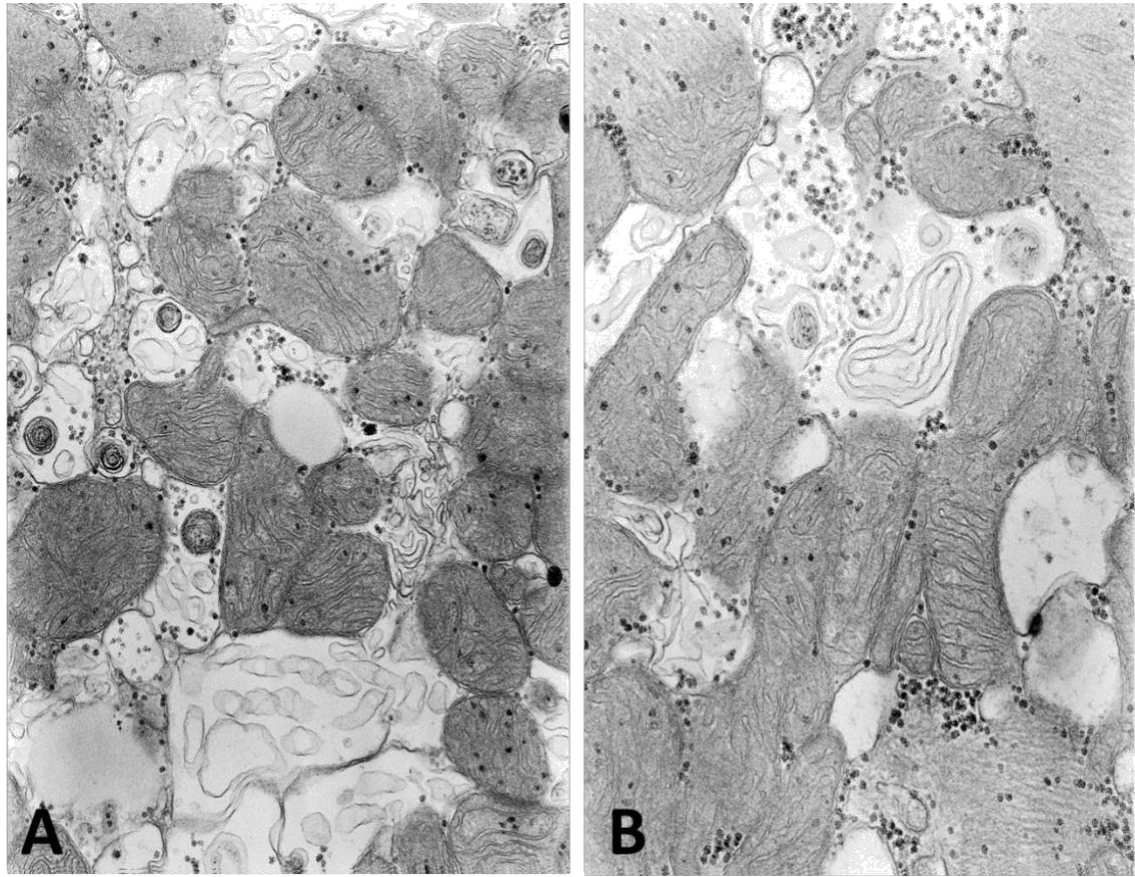

**Supplemental Figure S13. Higher magnification of A and B electron panels of the figure 12.**

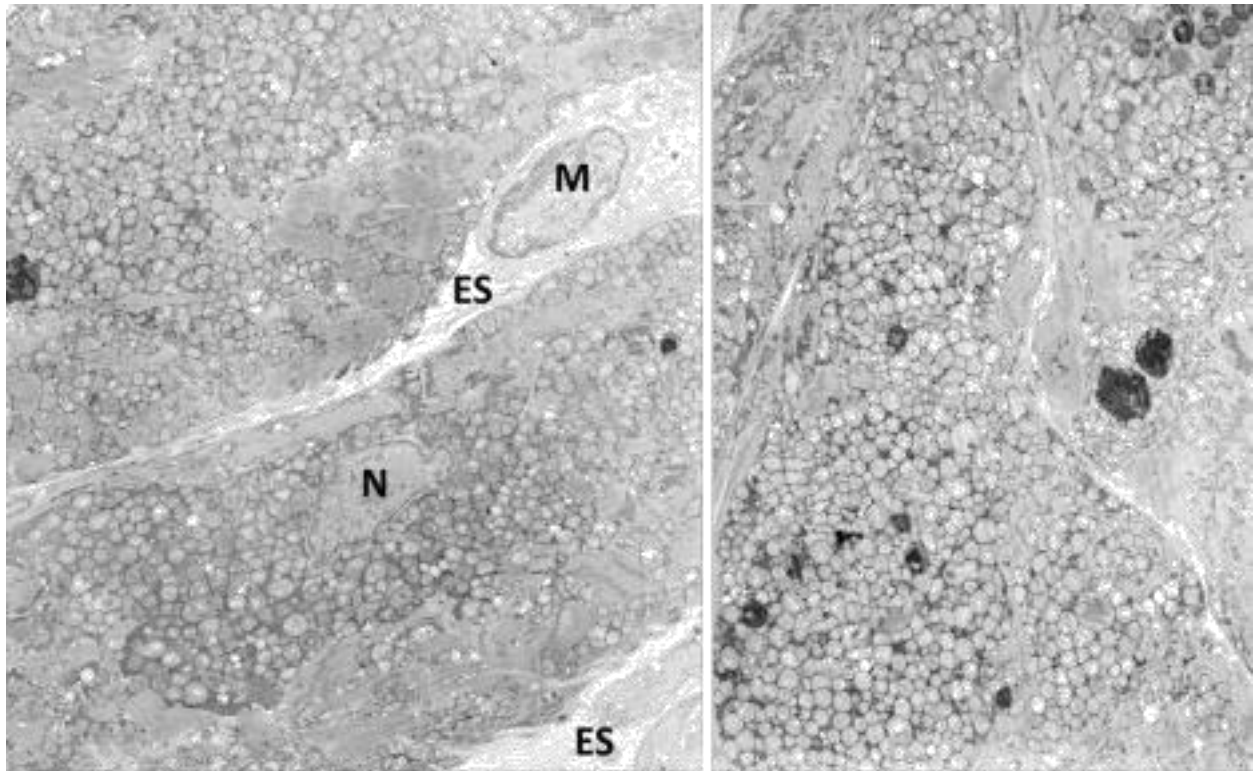

**Supplemental Figure S14. Baseline transmission electron microscopy showing alterations of mitochondria.**

Large groups of swollen mitochondria in a cytoplasm with reduced myofibrillar content and disorganized sarcomeres. Grouping of mitochondria may be responsible for an inefficient supply of high-energy phosphate molecules to the ATP-dependent functions, such as contraction. N = nucleus; ES = extracellular space; M = monocyte or large lymphocyte.

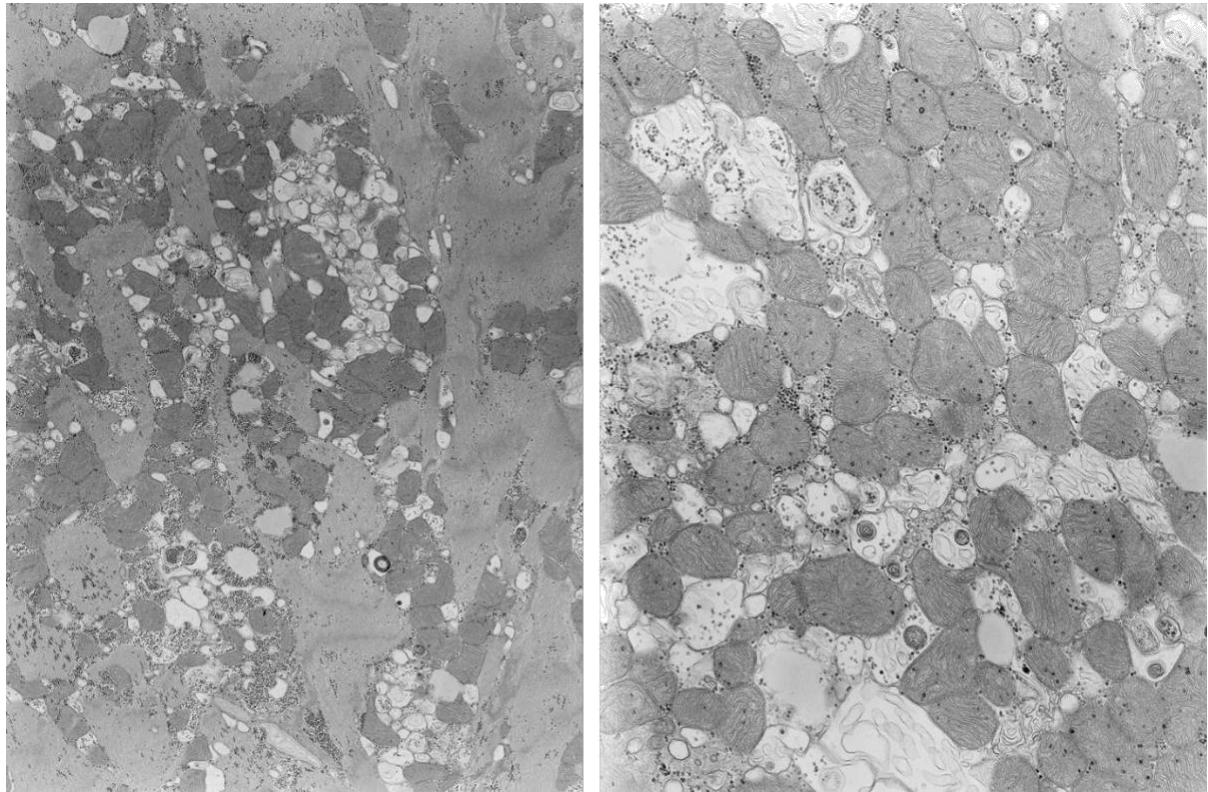

**Supplemental Figure S15. Baseline transmission electron microscopy showing further details of dilated vesicles likely derived from sarcoplasmic reticulum, Golgi apparatus, lysosomes and other organelles.**

The electron clear areas containing glycogen particles are either swollen cytosol or the lumen of an autophagocytic vacuole. Mitochondria are in orthodox/slightly swollen conformation.



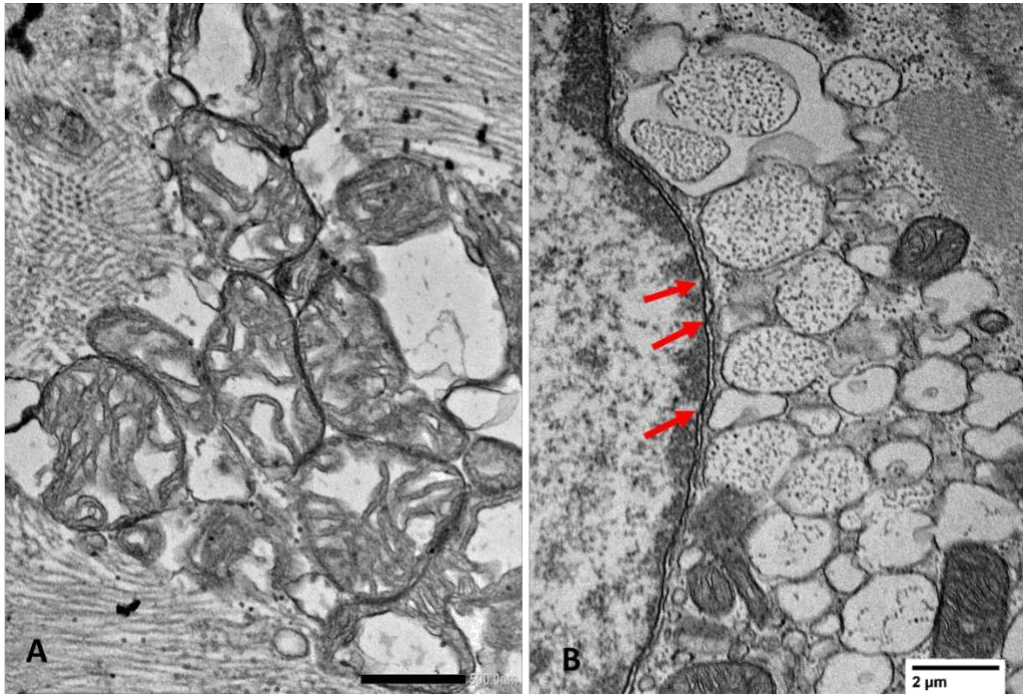

**Supplemental Figure S16. Baseline transmission electron microscopy showing detail of highly swollen mitochondria and other organelles.**

A. Detail of mitochondria: diluted and vesiculated matrix with irregular cristae and damaged outer membrane

B. Detail small dilated vesicles of heterogeneous origin: phagosomes, autophagosomes, cyternae of sarcoplasmic reticulum (strictly interacting with outer mitochondrial membrane) and, possibly, Golgi apparatus (close to nuclear membrane).

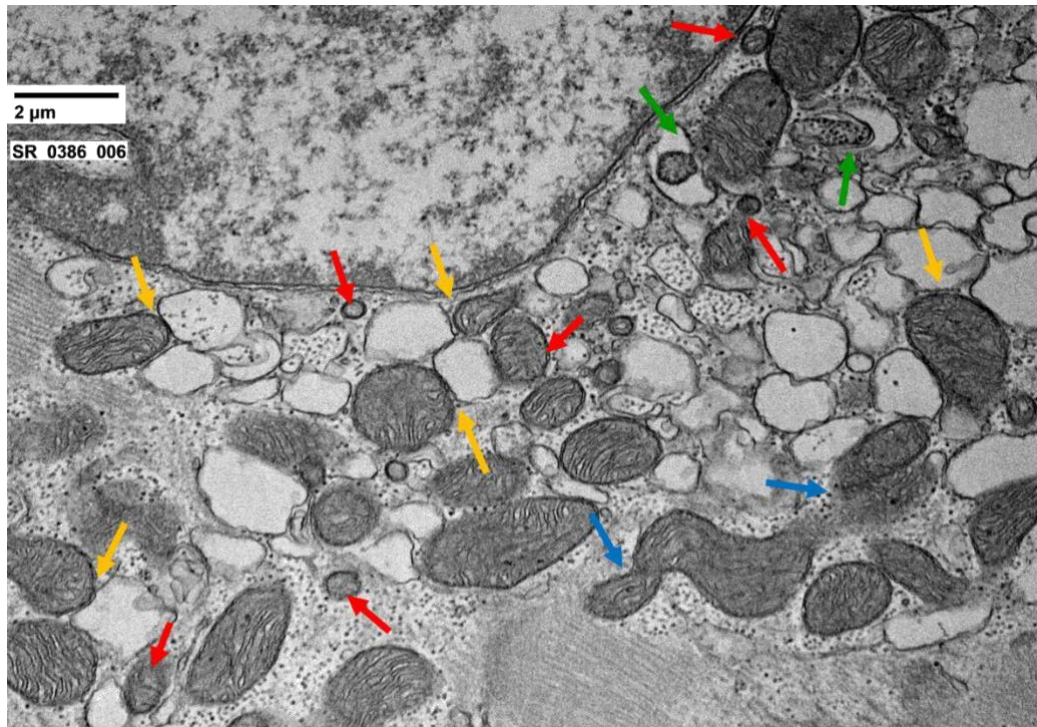

**Supplemental Figure S17. Perinuclear region with small vesicles to that observed in the figure S16.**

Electron microscopy showing a number of details of abnormal dynamics of mitochondria: micro-mitochondria (red arrows), bizarre fusion (blue arrows) close interaction with sarcoplasmic reticulum cisternae (orange arrows) and mitophagy (green arrows).

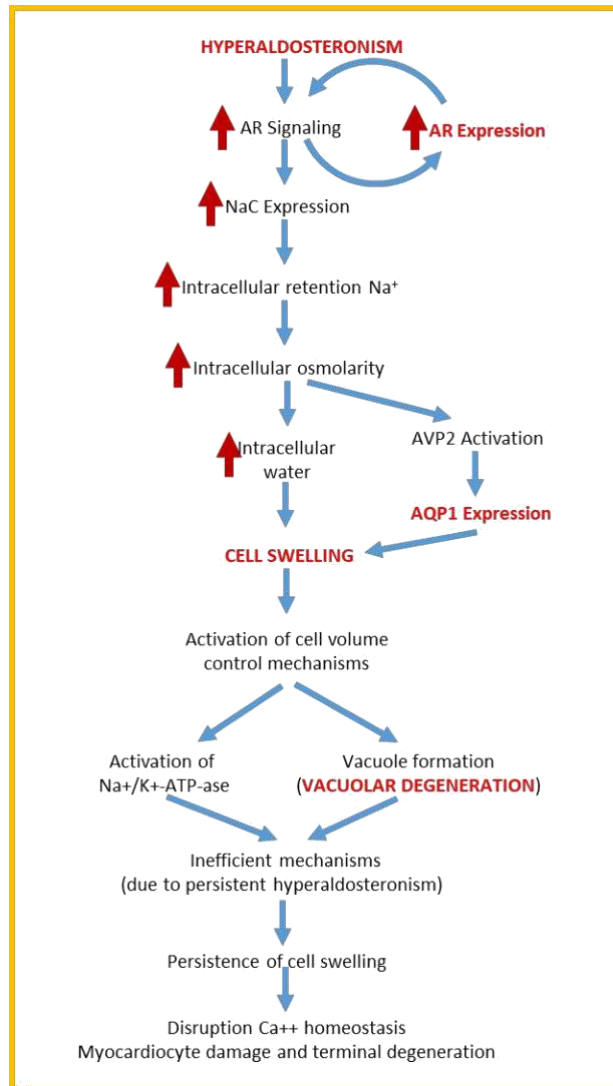

**Supplemental Figure S18. An hypothetical description of the sequence triggered by aldosterone signaling leading to ion/water homeostasis disruption and to the myocardocyte damage.**

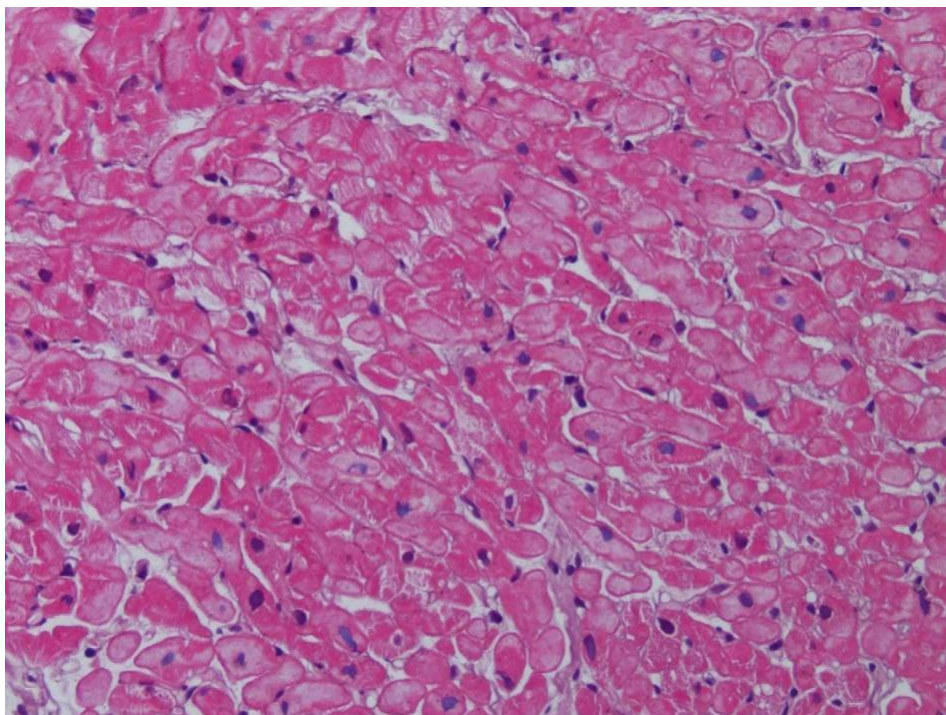

**Supplemental Figure S19. Normal myocardium from EMB sample at histology.**



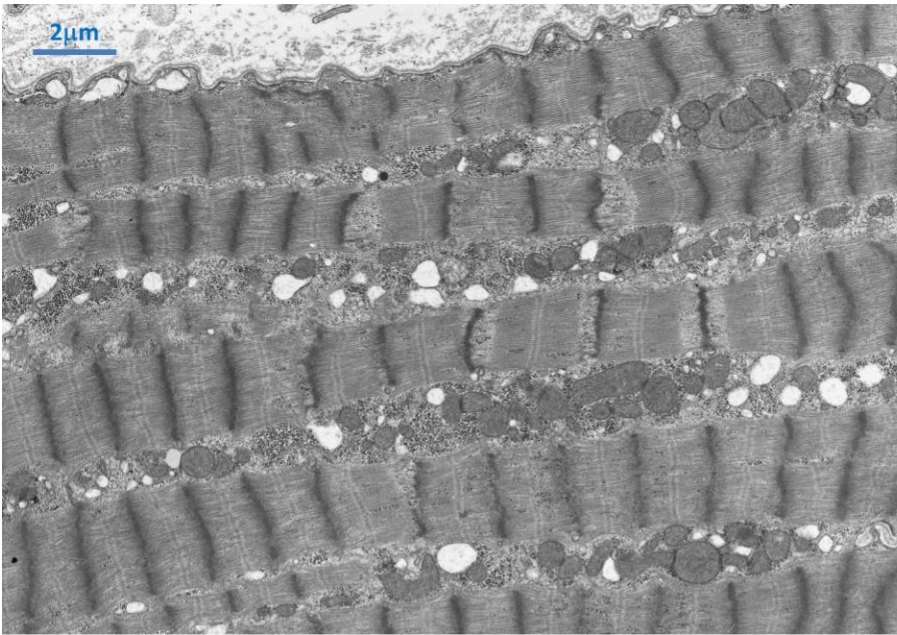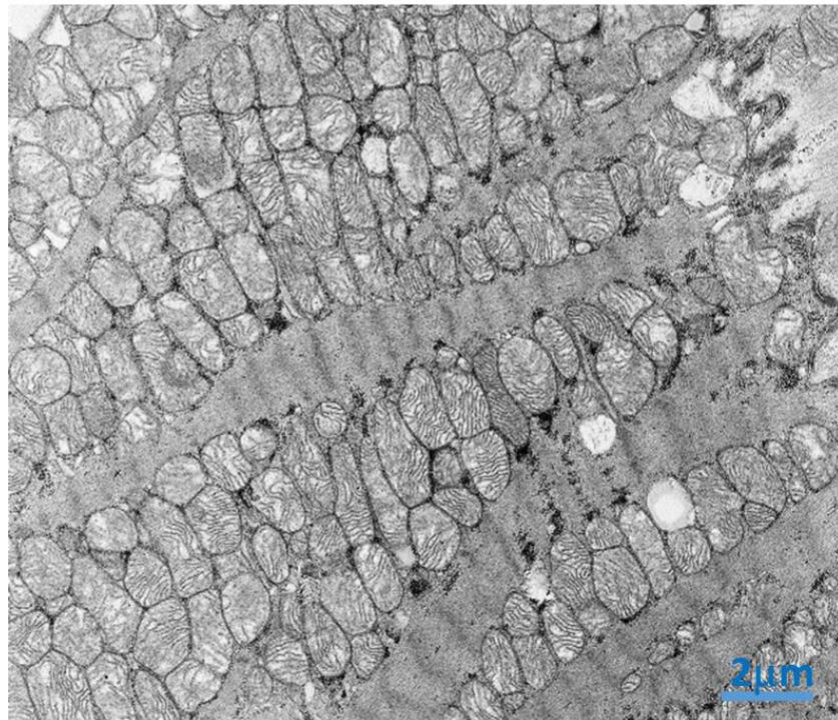

**Supplemental Figure S20. Normal myocardium from a EMB sample at transmission electron microscopy**
